# Supplementary material for: Multi-decadal trends in contingent mixing of Atlantic mackerel (Scomber scombrus) in the Northwest Atlantic from otolith stable isotopes
Source: PubMed Central journal article supplement (PMC7988008; doi:10.1038/s41598-021-86116-2), 2021-03-23
Supplement: 41598_2021_86116_MOESM1_ESM.pdf [file 41598_2021_86116_MOESM1_ESM.pdf]

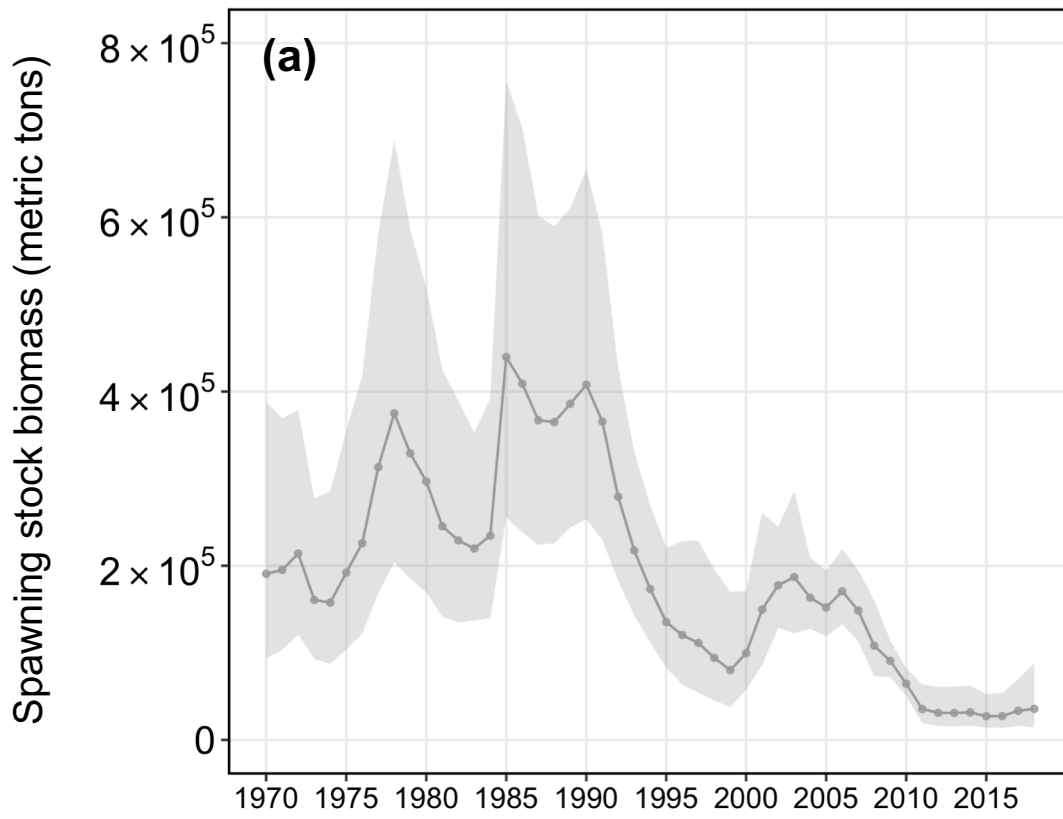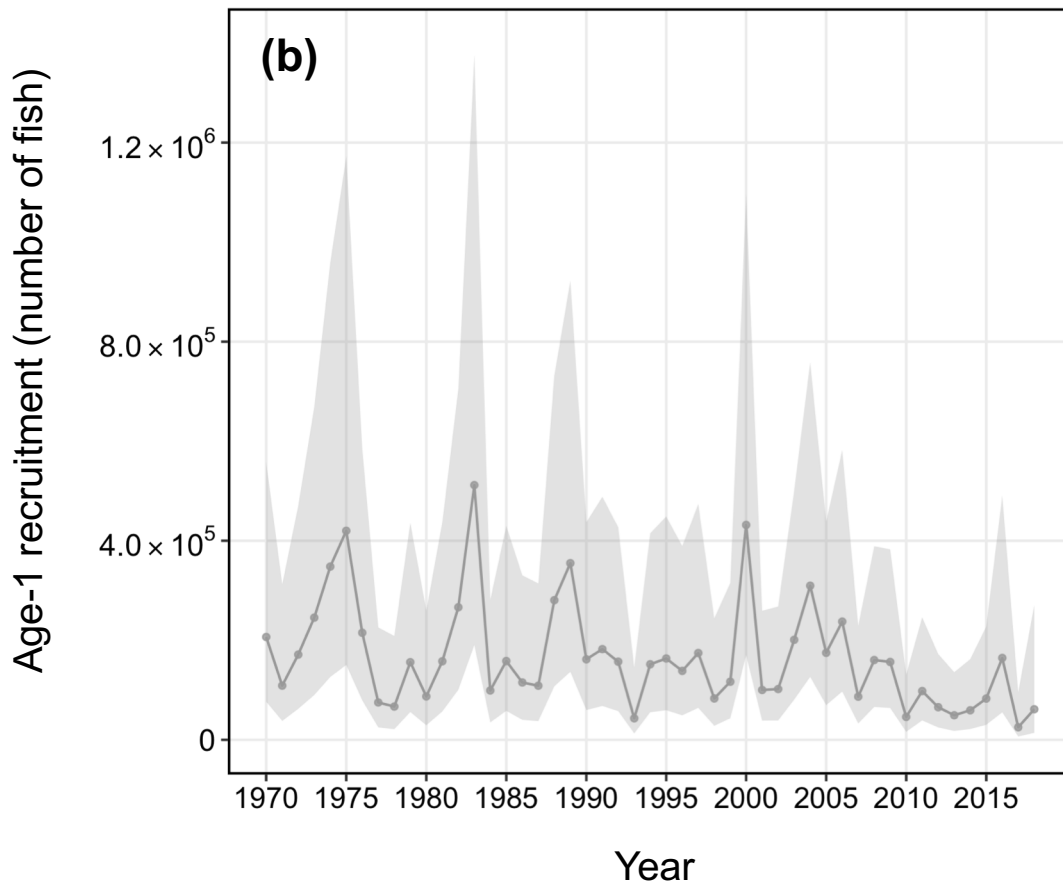

**Arai et al. Supplementary Figure 1**
